# Supplementary material for: Detailed formation process of Co@C catalysts and the influence of structural regulation on catalytic properties
Source: Royal Society of Chemistry journal article supplement (doi:10.1039/d1cp05631j), 2022-01-01
Supplement: d1cp05631j1.pdf [file d1cp05631j1.pdf]

## **Detailed Formation Process of Co@C Catalysts and the Influence of Structural Regulation on Catalytic Properties**

Zhe Cai<sup>ab‡</sup>, Shuai Lyu<sup>c‡</sup>, Chengchao Liu<sup>c</sup>, Yanxi Zhao<sup>c</sup>, Yuhua Zhang<sup>c</sup>, Faquan Yu<sup>a\*</sup>,  
Jinlin Li<sup>c\*</sup>

a. Key Laboratory for Green Chemical Process of Ministry of Education, Hubei Key Laboratory for Novel Reactor and Green Chemistry Technology, Hubei Engineering Research Center for Advanced Fine Chemicals, and School of Chemical Engineering and Pharmacy, Wuhan Institute of Technology, Wuhan 430205, P. R. China. E-mail: [fyu@wit.edu.cn](mailto:fyu@wit.edu.cn)

b. The College of Post and Telecommunication of Wuhan Institute of Technology, Wuhan 430205, P. R. China.

c. Key Laboratory of Catalysis and Materials Science of the State Ethnic Affairs Commission & Ministry of Education, South-Central University for Nationalities, Wuhan 430074, Hubei Province, P.R. China. E-mail: [jinlinli@aliyun.com](mailto:jinlinli@aliyun.com)

‡ These authors are contributed equally to this work.

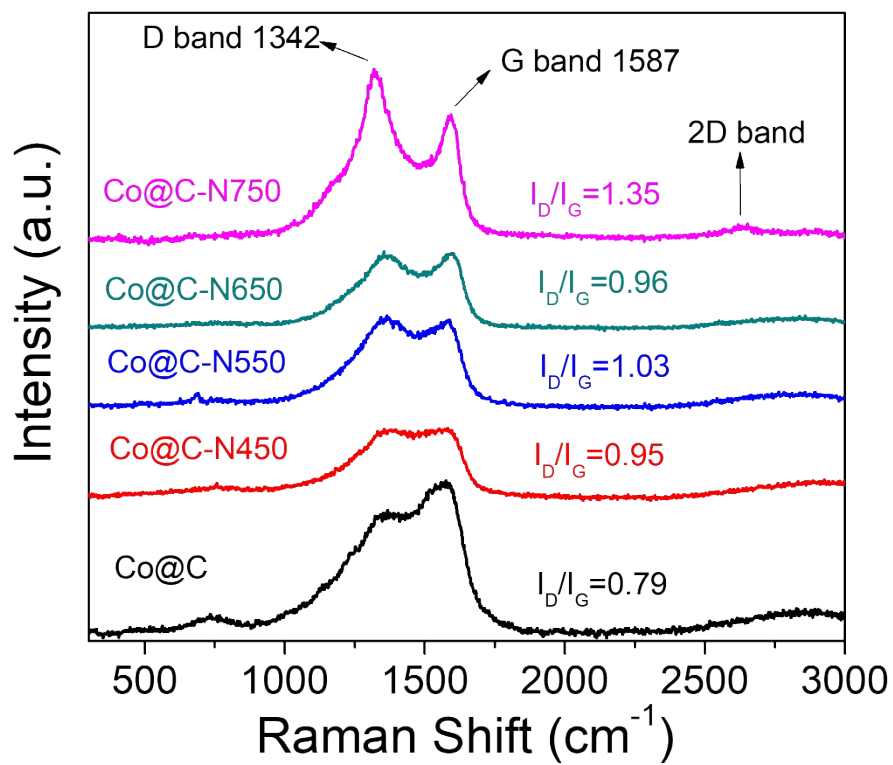

Figure S1 Raman spectrum of Co@C, Co@C-N450, Co@C-N550, Co@C-N650 and Co@C-N750

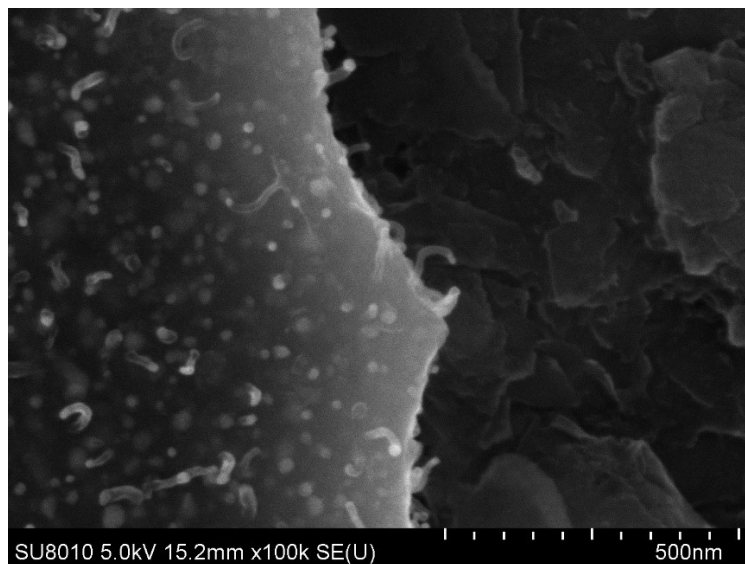

Figure S2 SEM image of Co@C-N750
